# Supplementary material for: Chili Pepper Jojutla Morelos (Capsicum annuum L.), CJ-2018: A Variety Resistant to Bactericera cockerelli
Source: MDPI journal article supplement (doi:10.3390/insects13080742), 2022-08-18
Supplement: s1 [file insects-1806685-supplementary.pdf › insects-1806685-supplementary.pdf]

## Supplementary Materials

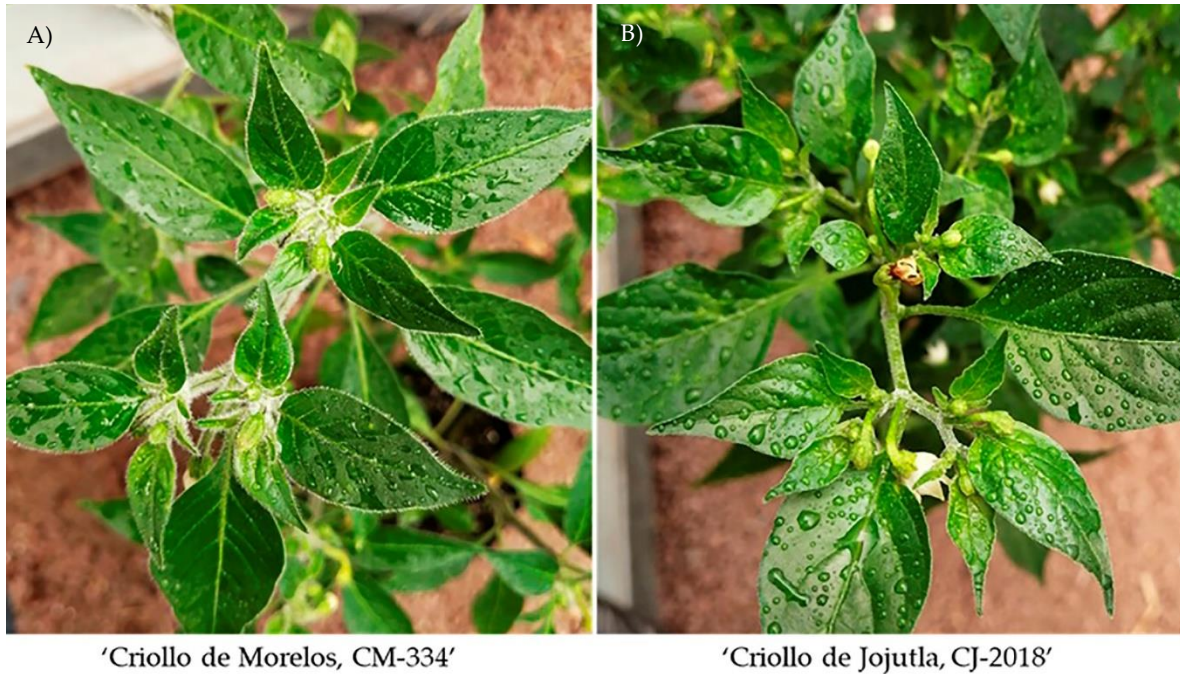

Figure S1. Aerial view of both varieties evaluated. A) 'Criollo de Morelos' (CM-334) and B) 'Criollo de Jojutla' (CJ.2018). Plants were grown under greenhouse conditions.

Table S1. Developmental times of *B. cockerelli* immature stages fed on different chili pepper varieties under controlled conditions.

| Chili pepper variety         | Developmental time in days |                          |                          |                          |                          |                          |
|------------------------------|----------------------------|--------------------------|--------------------------|--------------------------|--------------------------|--------------------------|
|                              | Eggs                       | First instar Nymph       | Second instar Nymph      | Third instar Nymph       | Fourth instar Nymph      | Fifth instar Nymph       |
| Árbol                        | 5.90 ± 0.54 <sup>a</sup>   | 4.65 ± 0.58 <sup>a</sup> | 3.62 ± 0.58 <sup>a</sup> | 3.58 ± 0.58 <sup>a</sup> | 3.59 ± 0.58 <sup>a</sup> | 4.61 ± 0.59 <sup>a</sup> |
| Criollo de Morelos (CM-334)  | 5.77 ± 0.61 <sup>a</sup>   | 4.62 ± 0.59 <sup>a</sup> | 3.55 ± 0.62 <sup>a</sup> | 3.47 ± 0.60 <sup>a</sup> | 3.40 ± 0.55 <sup>a</sup> | 4.39 ± 0.53 <sup>a</sup> |
| Criollo de Jojutla (CJ-2018) | 6.45 ± 0.50 <sup>a</sup>   | 4.83 ± 0.52 <sup>a</sup> | 4.02 ± 0.67 <sup>a</sup> | 4.27 ± 0.66 <sup>a</sup> | 4.33 ± 0.70 <sup>a</sup> | ---                      |

Each point represents the average of 10 repetitions corresponding to two repetitions of the test. Values with different superscript letters in each column are significantly different (Tukey test  $p < 0.05$ ). During the experiment only one egg managed to reach the adult stage on CJ2018. It took 6 days to develop from Fifth instar nymph to adult.
